# Supplementary material
Source: PubMed Central journal article supplement (PMC1914389)

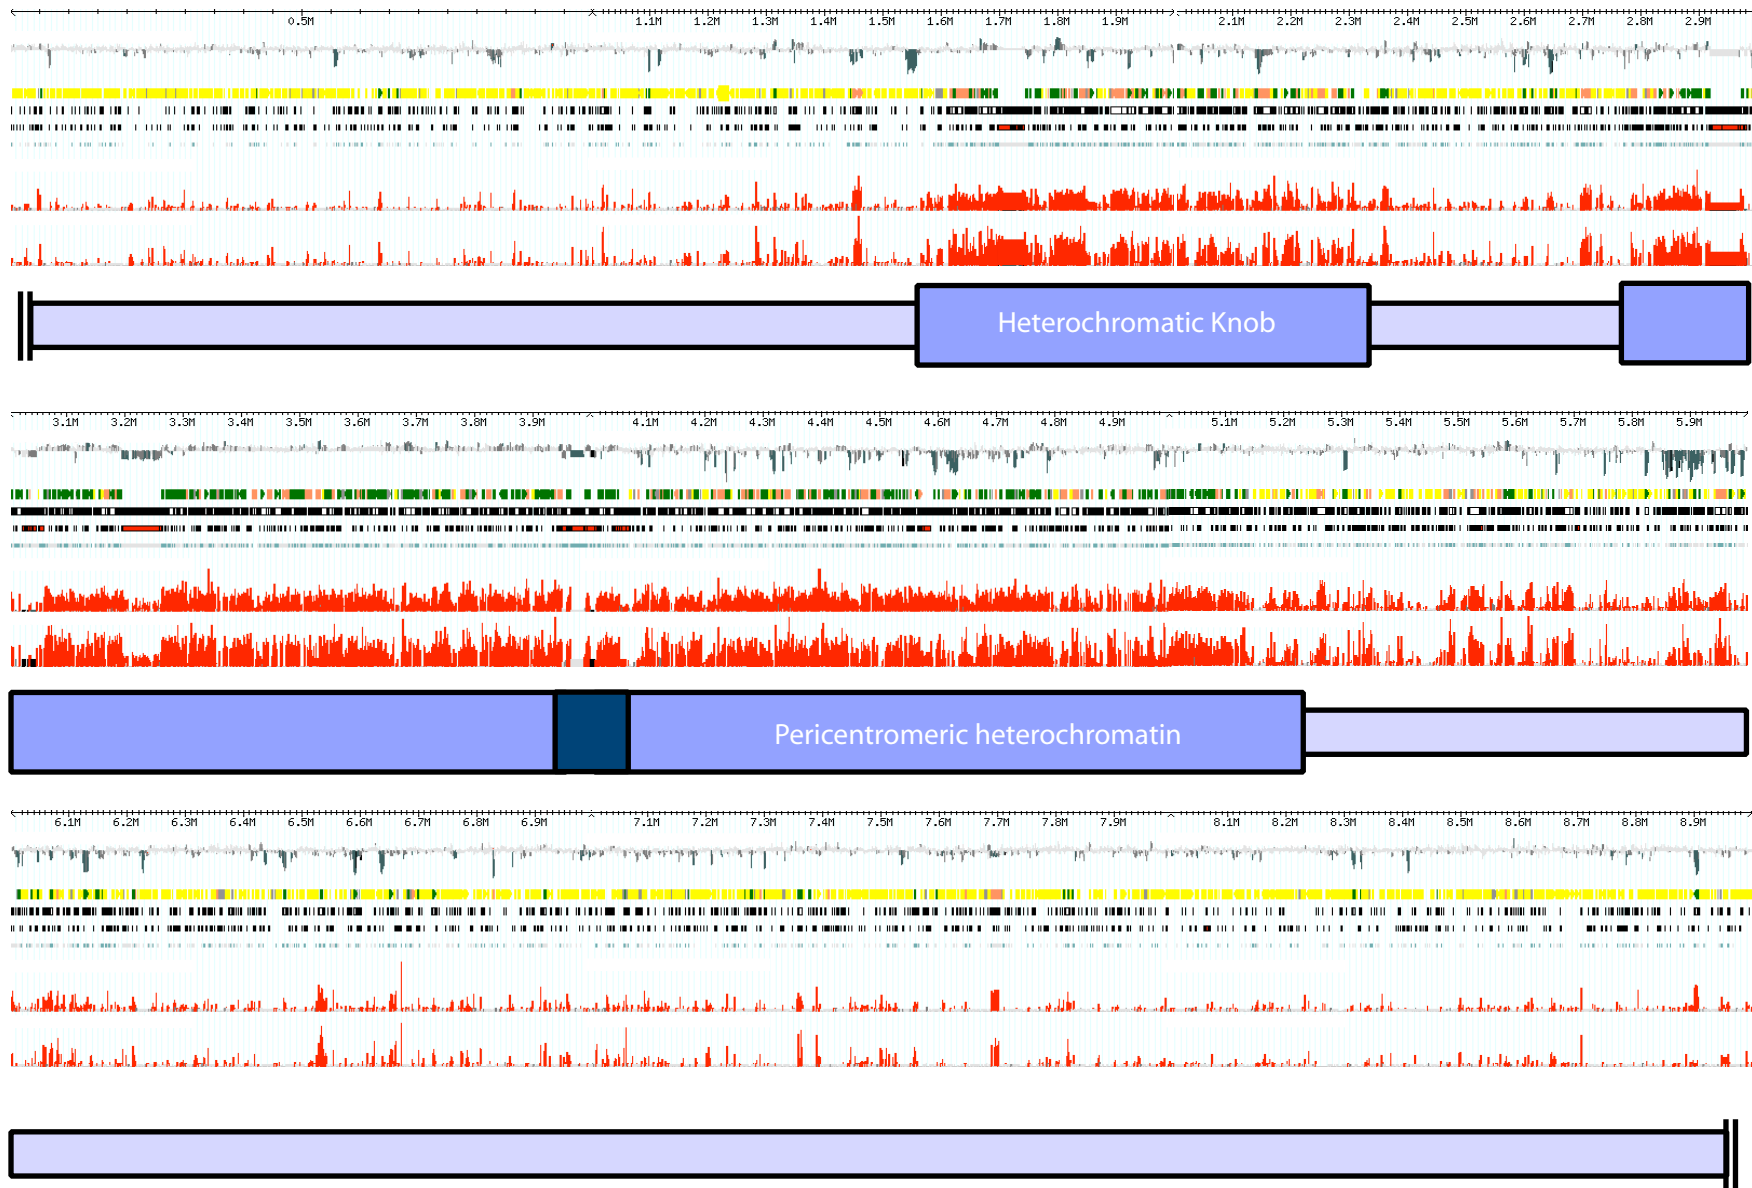

Figure S1

Supplement: pbio.0050174.sg001.pdf [file pbio.0050174.sg001.pdf]

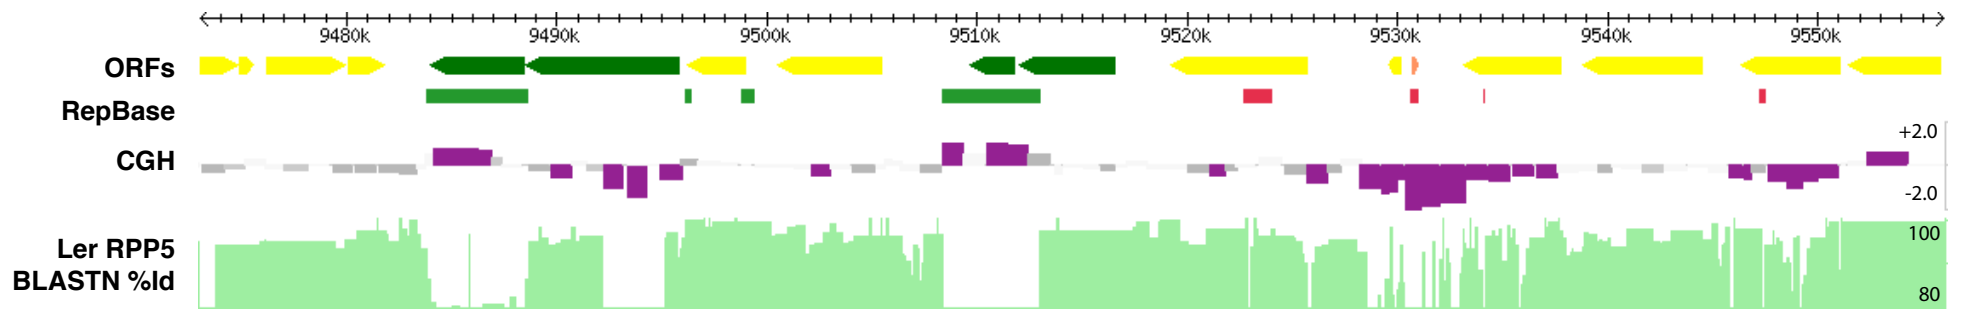

Figure S2

Supplement: pbio.0050174.sg002.pdf [file pbio.0050174.sg002.pdf]

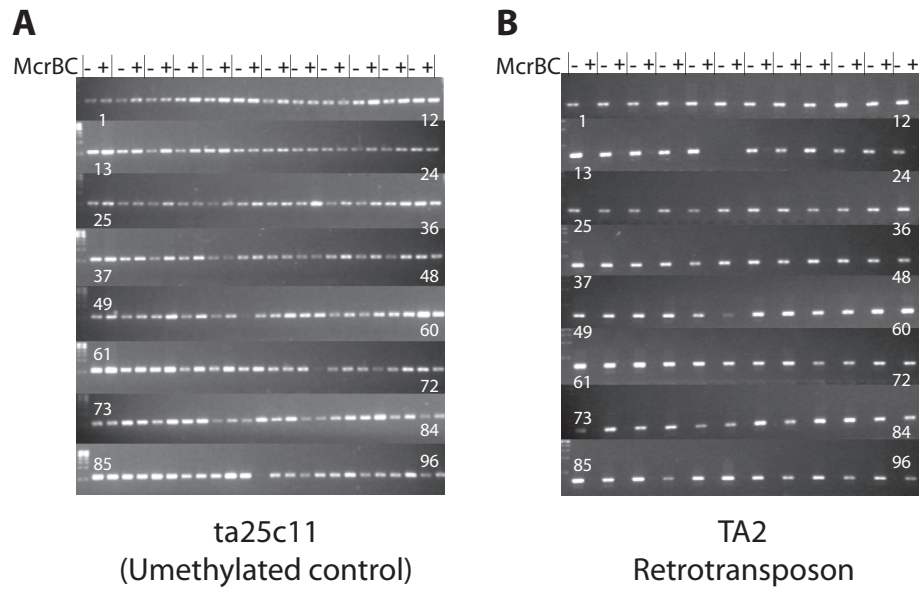

Figure S3

Supplement: pbio.0050174.sg003.pdf [file pbio.0050174.sg003.pdf]

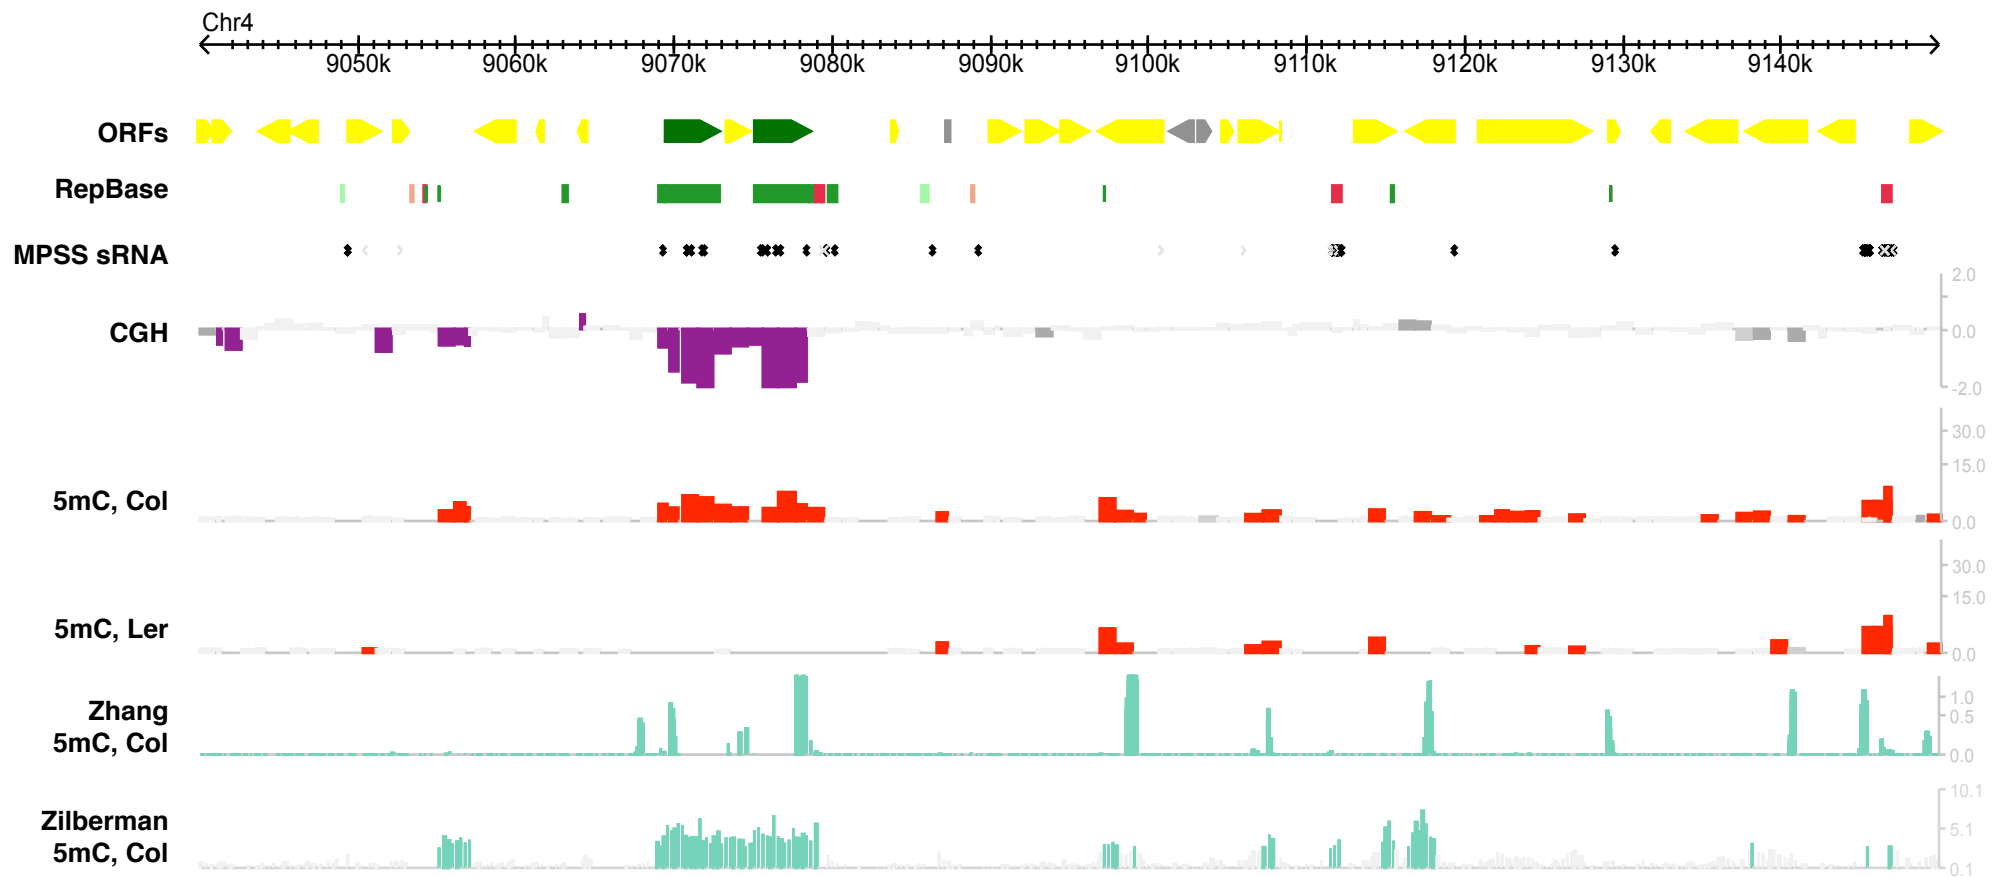

Figure S4

Supplement: pbio.0050174.sg004.pdf [file pbio.0050174.sg004.pdf]

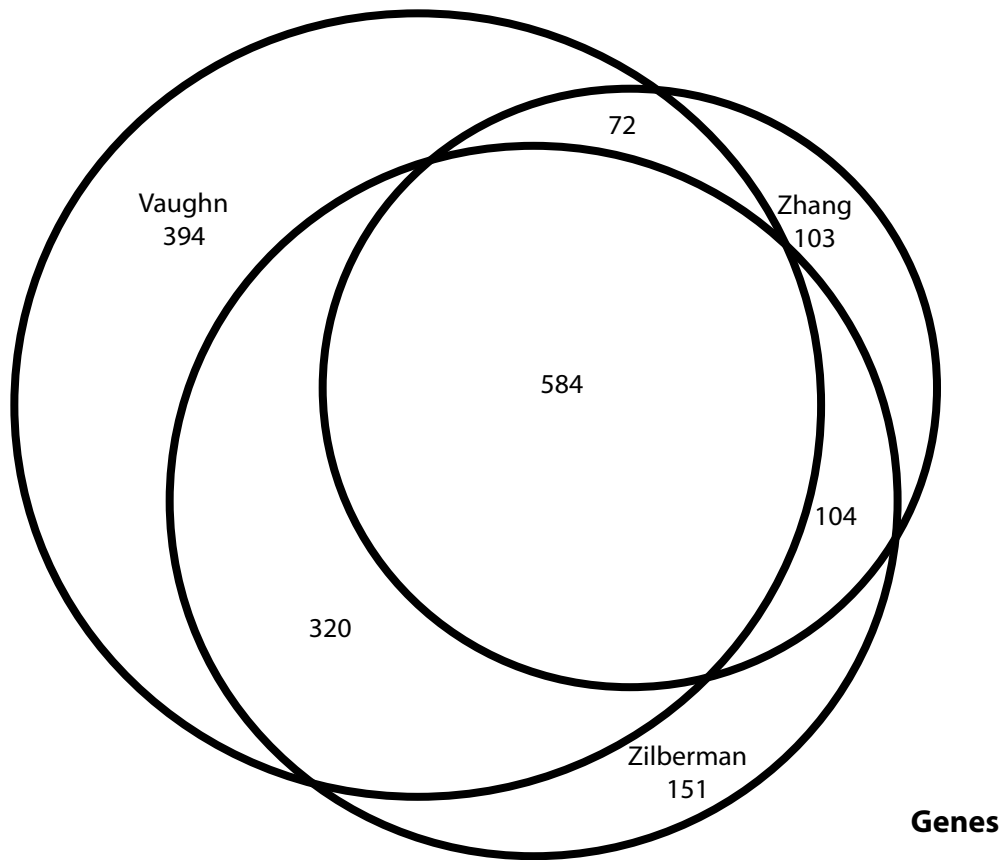

**Genes**

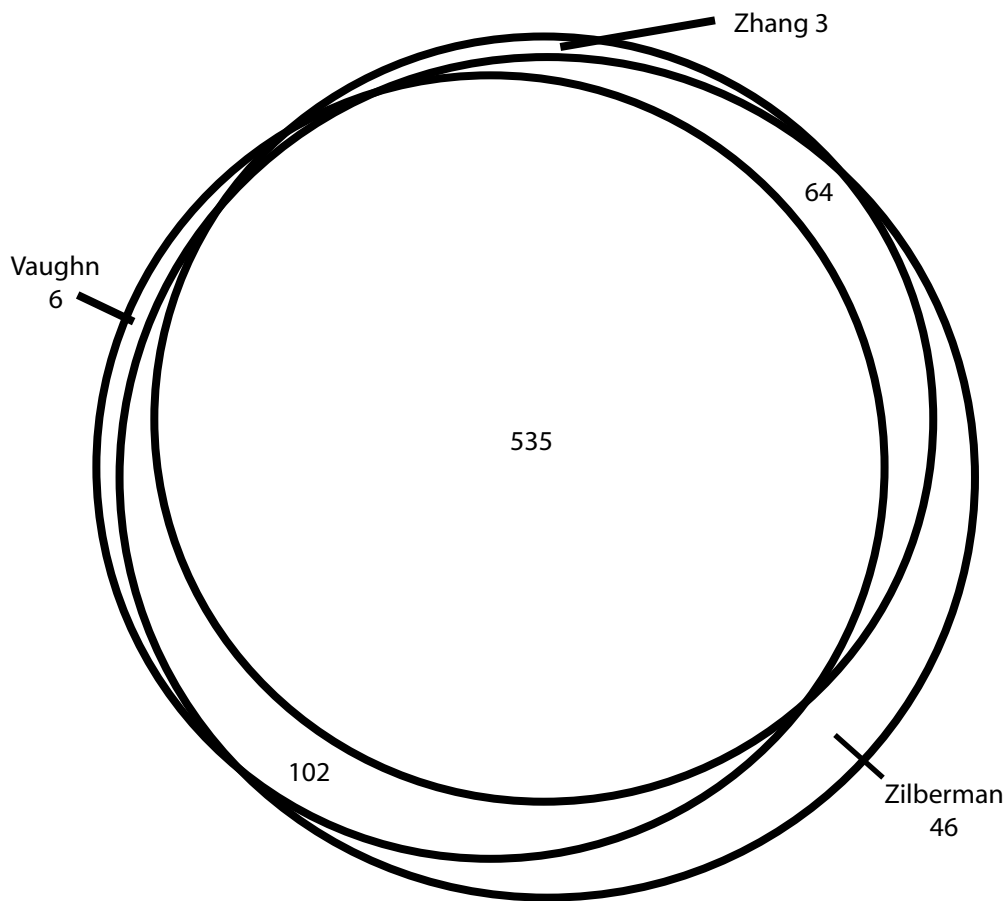

**Transposable Elements**

Figure S5

Supplement: pbio.0050174.sg005.pdf [file pbio.0050174.sg005.pdf]
